# Supplementary material
Source: publisher figshare collection journal article supplement (https://acs.figshare.com/ndownloader/files/3935560)
Supplement: Supplementary file 1 [file 3935560]

## Supporting information

### Dextran-peptide Hybrid for Efficient Gene Delivery

*Qiong Tang,<sup>1</sup> Bin Cao,<sup>1</sup> Xia Lei,<sup>1</sup> Bingbing Sun,<sup>2</sup> Yanqiao Zhang<sup>3</sup> and Gang Cheng<sup>1\*</sup>*

<sup>1</sup> Department of Chemical and Biomolecular Engineering, University of Akron, Akron, OH 44325, USA.

<sup>2</sup> Department of Medicine, University of California at Los Angeles, Los Angeles, CA 90095, USA.

<sup>3</sup> Department of Integrative Medical Sciences, Northeast Ohio Medical University, Rootstown, OH 44272, USA

KEYWORDS: Dextran, peptide, hybrid, Gene delivery, degradability

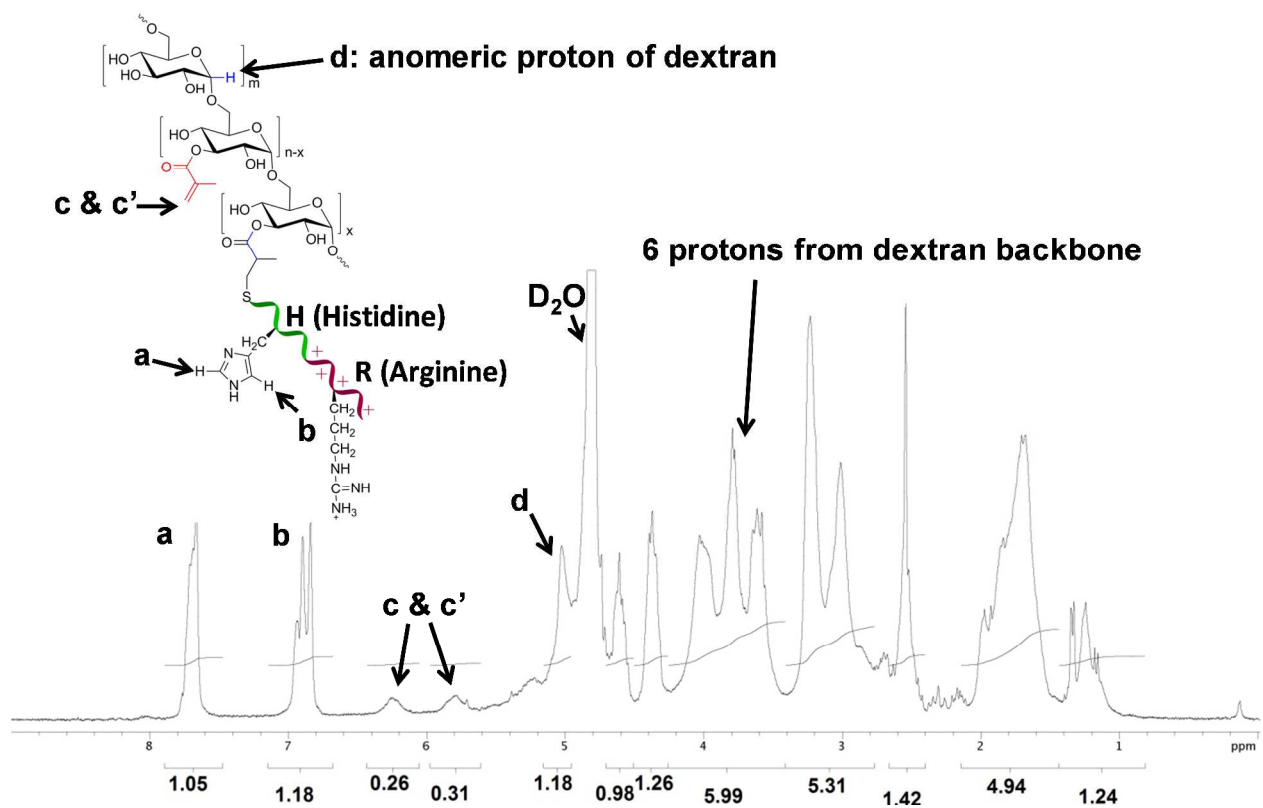

**Figure S1.** 300MHz  $^1\text{H}$  NMR spectrum of Dex10-R5H5(20%) in  $\text{D}_2\text{O}$ .

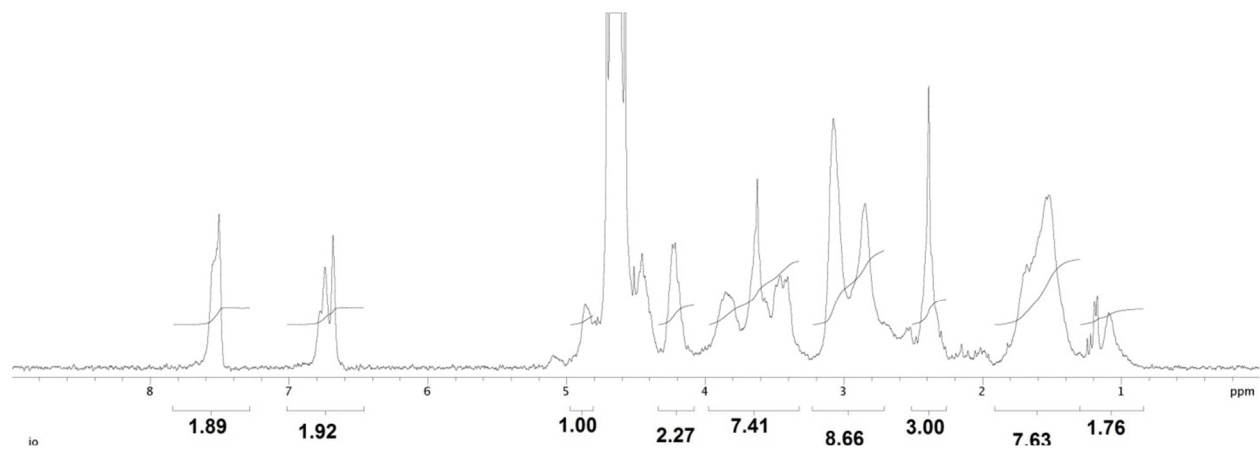

**Figure S2.** 300MHz <sup>1</sup>H NMR spectrum of Dex10-R5H5(40%) in D<sub>2</sub>O.

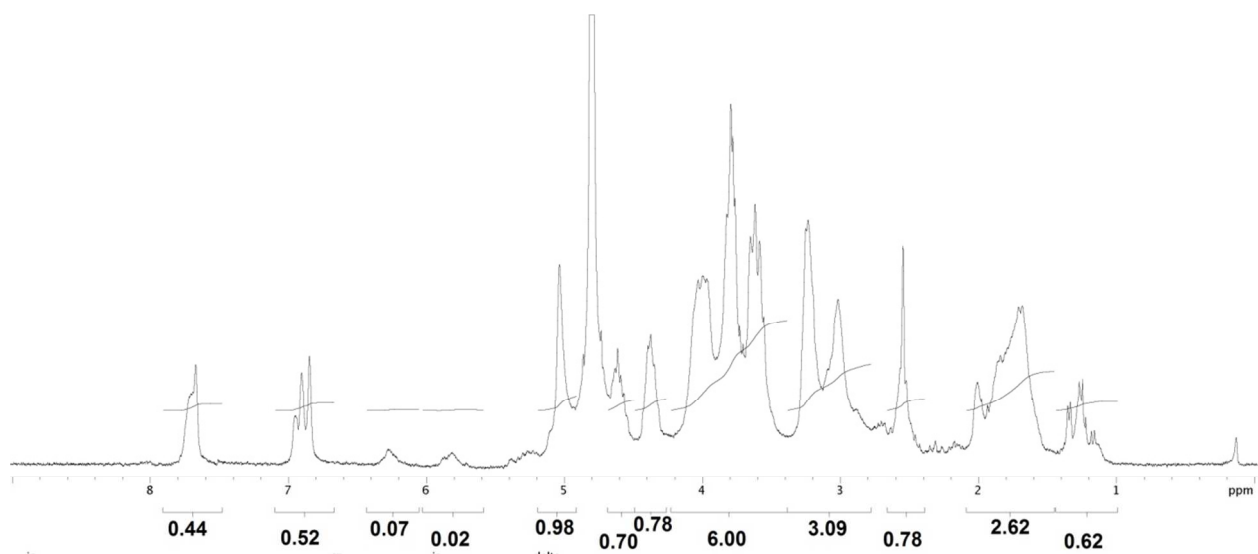

**Figure S3.** 300MHz <sup>1</sup>H NMR spectrum of Dex20-R5H5(10%) in D<sub>2</sub>O.

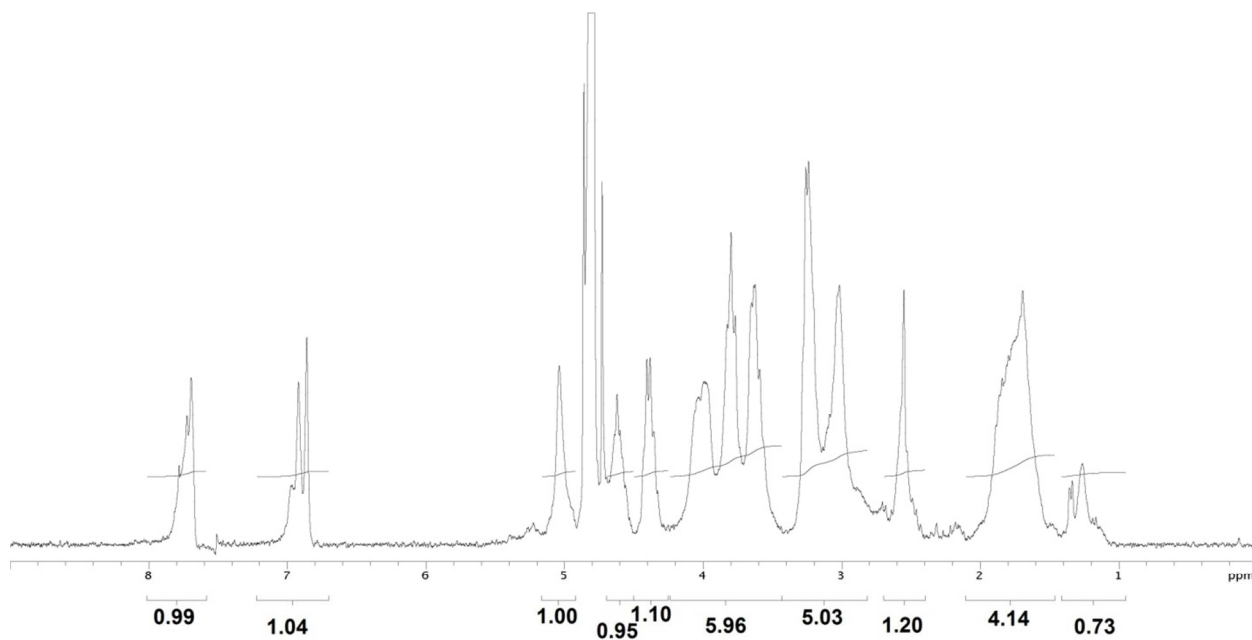

**Figure S4.** 300MHz <sup>1</sup>H NMR spectrum of Dex20-R5H5(20%) in D<sub>2</sub>O.

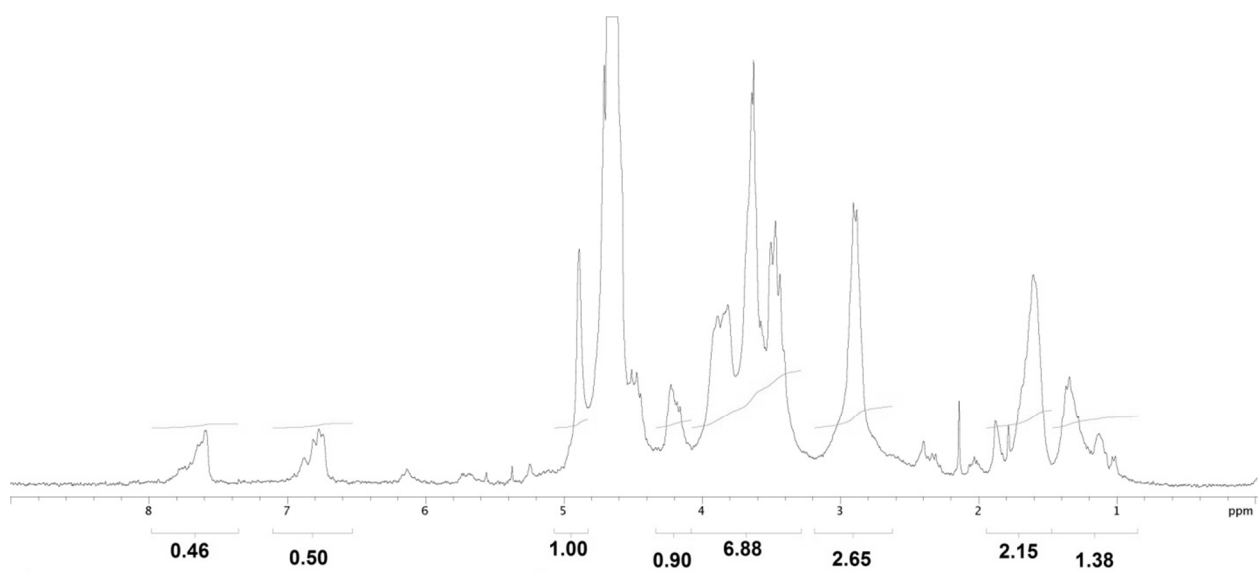

**Figure S5.** 300MHz <sup>1</sup>H NMR spectrum of Dex70-R5H5(10%) in D<sub>2</sub>O.
